# Supplementary material for: Cyclic single-molecule magnets: from the odd-numbered heptanuclear to a dimer of heptanuclear dysprosium clusters
Source: Royal Society of Chemistry journal article supplement (doi:10.1039/c5cc08740f), 2015-12-11
Supplement: c5cc08740f1.pdf [file c5cc08740f1.pdf]

## Supporting Information

### Odd-numbered cyclic single-molecule magnets: from heptanuclear to dimer of heptanuclear dysprosium clusters

Haiquan Tian, Song-Song Bao, Li-Min Zheng\*

#### *Experimental Section*

##### **Synthetic procedures**

1-naphthylphosphonic acid ( $C_{10}H_7PO_3H_2$ ) was prepared according to the literature method.<sup>1</sup> All chemicals were of reagent grade and were used without any further purification.

**Synthesis of (*E*)-*N'*-(2-hydroxy-3-methoxybenzylidene)pyrazine-2-carbohydrazide (**H<sub>2</sub>opch**).** Pyrazine-2-carbohydrazide (3 mmol, 0.414 g) was suspended together with *o*-vanillin (3 mmol, 0.456 g) in methanol (20 mL), and the resulting mixture was stirred at the room temperature overnight. The pale yellow solid was collected by filtration (yield: 0.84 g, 83%). Elemental analysis (%) calcd for  $C_{13}H_{12}N_4O_3$ : C, 57.35, H, 4.44, N, 20.58; found C, 58.64, H, 4.59, N, 20.39. IR (KBr,  $cm^{-1}$ ): 3415(w), 3258(w), 1677(vs), 1610(s), 1579(m), 1530(s), 1464(s), 1363(m), 1255(vs), 1153(s), 1051(w), 1021(s), 986(w), 906(m), 938(w), 736(s), 596(m), 498(w).

**Synthesis of (*N'*,*N''E*,*N'*,*N''E*)-*N'*,*N''*-(ethane-1,2-diylidene)dipyrazine-2-carbohydrazide (**H<sub>2</sub>EDDC**).** Pyrazine-2-carbohydrazide (20 mmol, 2.764 g) was suspended together with glyoxal (10 mmol, 0.582 g) in methanol (40 ml), and the resulting mixture was stirred at the room temperature overnight. The pure white solid was collected by filtration (yield: 2.76 g, 64%). Elemental analysis (%) calcd for  $C_{12}H_{10}N_8O_2$ : C, 48.32, H, 3.38, N, 37.57; found C, 47.00, H, 3.65, N, 36.34. IR (KBr,  $cm^{-1}$ ): 3420(m), 3241(w), 1678(vs), 1579(m), 1529(s), 1474(m), 1407(m), 1316(m), 1282(w), 1157(w), 1058(w), 1021(s), 950(w), 917(w), 868(m), 772(m), 648(w), 422(m).

**Synthesis of  $[Dy_7(EDDC)(opch)_4(O_3PC_{10}H_7)_3(OAc)_5(MeOH)_2] \cdot 4MeOH$  (**1**).** To a slurry of **H<sub>2</sub>EDDC** (59.6 mg, 0.20 mmol) and triethylamine (0.14 ml, 1.0 mmol) in

methanol (20 mL), solid Dy(OAc)<sub>3</sub>·4H<sub>2</sub>O (164.8 mg, 0.40 mmol) was added. After stirring for 24 h, the H<sub>2</sub>opch (108.0 mg, 0.40 mmol) and C<sub>10</sub>H<sub>7</sub>PO<sub>3</sub>H<sub>2</sub> (20.8 mg, 0.10 mmol) were added to the resulting pale yellow solution. Then the mixture was stirred for another 24 h, followed by filtration. Next, the resultant yellow solution was transferred to a 25 mL glass ware and sealed. The glass ware was keep into a drying oven and the reaction mixture was heated at 100 °C. Red single crystals, suitable for X-ray diffraction analysis, were formed after for 48 h as single-phase product. Yield: 67 mg (43%, based on Dy). Elemental analysis (%) calcd for C<sub>110</sub>H<sub>108</sub>Dy<sub>7</sub>N<sub>24</sub>O<sub>39</sub>P<sub>3</sub>: C, 36.49, H, 3.00, N, 9.28: found C, 35.97, H, 2.86, N, 9.74. IR (KBr, cm<sup>-1</sup>): 3419(m), 2972(w), 1604(vs), 1565(m), 1522(w), 1450(m), 1345(w), 1239(m), 1220(m), 1160(m), 1136(m), 1074(m), 1033(m), 1009(m), 969(m), 922(m), 862(w), 802(w), 776(w), 741(w), 676(w), 646(w), 599w), 548(m), 553(w), 511(w), 424(w). Thermal analysis reveals a weight loss of 5.2% in the temperature range 30-250°C, in agreement with the removal of six methanol molecules (calcd. 5.3%).

**Synthesis of [Dy<sub>14</sub>(EDDC)<sub>4</sub>(opch)<sub>4</sub>(O<sub>3</sub>PC<sub>10</sub>H<sub>7</sub>)<sub>10</sub>(OAc)<sub>6</sub>(H<sub>2</sub>O)<sub>4</sub>]·xH<sub>2</sub>O (2).** To a slurry of H<sub>2</sub>EDDC (59.6 mg, 0.20 mmol) and triethylamine (0.14 mL, 1.0 mmol) in methanol (20 mL), solid Dy(OAc)<sub>3</sub>·4H<sub>2</sub>O (164.8 mg, 0.40 mmol) was added. After stirring for 24 h, the H<sub>2</sub>opch (108.0 mg, 0.40 mmol) and C<sub>10</sub>H<sub>7</sub>PO<sub>3</sub>H<sub>2</sub> (41.6 mg, 0.20 mmol) were added to the resulting pale yellow solution. Then the mixture was stirred for another 24 h, followed by filtration. Next, the resultant yellow solution was transferred to a 25 mL glass ware and sealed. The glass ware was kept into a drying oven and the reaction mixture was heated at 100 °C. Red single crystals, suitable for X-ray diffraction analysis, were formed after for 48 h as single-phase product. Yield: 85 mg (54%, based on Dy). Elemental analysis (%) calcd for C<sub>212</sub>H<sub>168</sub>Dy<sub>14</sub>N<sub>48</sub>O<sub>66</sub>P<sub>10</sub>·9H<sub>2</sub>O: C, 35.38, H, 2.59, N, 9.35: found C, 35.30, H, 2.83, N, 9.18. IR (KBr, cm<sup>-1</sup>): 3416(m), 2968(w), 1609(vs), 1562(m), 1544(w), 1521(w), 1452(s), 1419(w), 1377(w), 1346(m), 1289(w), 1241(m), 1217(s), 1159(m), 1105(w), 1048(w), 1029(w), 1020(w), 971(w), 925(w), 860(w), 785(w), 770(w), 743(m), 708(w), 642(w), 532(w), 484(w), 425(m). Thermal analysis reveals a weight loss of 3.3% in the temperature range 30-260°C, in agreement with the removal of thirteen water molecules (calcd. 3.3%).

### Single-Crystal Structure Determination

Single crystals of dimensions  $0.30 \times 0.30 \times 0.35 \text{ mm}^3$  for **1** and  $0.25 \times 0.25 \times 0.30 \text{ mm}^3$  for **2** were mounted on a glass rod. The crystal data were collected on a Bruker SMART APEX II diffractometer using monochromated Mo-K $\alpha$  radiation ( $\lambda = 0.71073 \text{ \AA}$ ) at 123(2) K for **1** and **2**. The structures were solved by direct methods and refined on  $F^2$  by full matrix least squares using SHELXTL.<sup>2</sup> All non-hydrogen atoms were refined anisotropically. All hydrogen atoms were either put in calculated positions or found from the difference Fourier maps and refined isotropically. Selected bond lengths and angles are given in Table S2. CCDC 1424266 (**1**)-1424267 (**2**) contain the supplementary crystallographic data for this paper. These data can be obtained free of charge from the Cambridge Crystallographic Data Centre via [www.ccdc.cam.ac.uk/data\\_request/cif](http://www.ccdc.cam.ac.uk/data_request/cif).

### Physical measurements

Elemental analyses for C, N and H were determined with a Perkin Elmer 240C elemental analyzer. Infrared spectra were recorded on a Bruker Tensor 27 spectrometer with KBr pellets in the range of  $400\text{--}4000 \text{ cm}^{-1}$ . Powder X-ray diffraction (PXRD) data were recorded on a Bruker D8 ADVANCE X-ray powder diffractometer (Cu-K $\alpha$ ) over the  $2\theta$  range of  $5$  to  $50^\circ$  at room temperature. Magnetic susceptibility measurements were performed in the temperature range  $1.8\text{--}300 \text{ K}$  using a vibrating sample magnetometer (VSM) of Quantum Design MPMS SQUID-VSM system. The diamagnetic contribution of the sample itself was estimated from Pascal's constant.<sup>3</sup>

### References:

1. I. P. Beletskaya, M. A. Kazankova, *Russian J. Org. Chem.*, 2002, **38**, 1391-692.
2. SHELXTL (version 5.0), Reference Manual, Siemens Industrial Automation, Analytical Instruments Madison, WI, 1995.
3. O. Kahn, *Molecular Magnetism*, VCH Publishers, Inc., New York, 1993.

**Table S1.** Summary of structural data of **1** and **2**.

| <b>Compound</b>                                                                         | <b>1</b>                                                                                         | <b>2</b>                                                                                           |
|-----------------------------------------------------------------------------------------|--------------------------------------------------------------------------------------------------|----------------------------------------------------------------------------------------------------|
| formula                                                                                 | C <sub>110</sub> H <sub>108</sub> Dy <sub>7</sub> N <sub>24</sub> O <sub>39</sub> P <sub>3</sub> | C <sub>212</sub> H <sub>176</sub> Dy <sub>14</sub> N <sub>48</sub> O <sub>70</sub> P <sub>10</sub> |
| mol wt                                                                                  | 3620.61                                                                                          | 7100.71                                                                                            |
| <i>T</i> [K]                                                                            | 123 (2)                                                                                          | 123(2)                                                                                             |
| $\lambda$ [Å]                                                                           | 0.71073                                                                                          | 0.71073                                                                                            |
| crystal syst                                                                            | monoclinic                                                                                       | monoclinic                                                                                         |
| space group                                                                             | <i>P</i> 2 <sub>1</sub> / <i>c</i>                                                               | <i>C</i> 2/ <i>c</i>                                                                               |
| <i>a</i> [Å]                                                                            | 14.7481(15)                                                                                      | 22.068(2)                                                                                          |
| <i>b</i> [Å]                                                                            | 33.056(3)                                                                                        | 25.118(3)                                                                                          |
| <i>c</i> [Å]                                                                            | 25.607(3)                                                                                        | 44.977(5)                                                                                          |
| $\alpha$ [deg]                                                                          | 90                                                                                               | 90                                                                                                 |
| $\beta$ [deg]                                                                           | 104.153(2)                                                                                       | 101.477(2)                                                                                         |
| $\gamma$ [deg]                                                                          | 90                                                                                               | 90                                                                                                 |
| <i>V</i> [Å <sup>3</sup> ]                                                              | 12105(2)                                                                                         | 24432(5)                                                                                           |
| <i>Z</i>                                                                                | 4                                                                                                | 4                                                                                                  |
| $\rho$ [g cm <sup>-3</sup> ]                                                            | 1.987                                                                                            | 1.930                                                                                              |
| $2\theta$ [deg]                                                                         | 0.962 – 28.307                                                                                   | 0.998 – 26.000                                                                                     |
| GOF                                                                                     | 1.064                                                                                            | 1.063                                                                                              |
| <i>R</i> 1                                                                              | 0.0796                                                                                           | 0.1576                                                                                             |
| w <i>R</i> 2                                                                            | 0.2131                                                                                           | 0.3752                                                                                             |
| ( $\Delta\rho$ ) <sub>max</sub> , ( $\Delta\rho$ ) <sub>min</sub> /[e Å <sup>-3</sup> ] | 5.68, -5.53                                                                                      | 2.55, -2.65                                                                                        |
| CCDC number                                                                             | 1424266                                                                                          | 1424267                                                                                            |

**Table S2.** Selected bond lengths (Å) and angles (°) for compounds **1** and **2**.

| NO.      | 1         | NO.         | 1          | NO.      | 2         | NO.         | 2          |
|----------|-----------|-------------|------------|----------|-----------|-------------|------------|
| Dy1- O7  | 2.2698(2) | Dy6- N23    | 2.4940(2)  | Dy1- O1  | 2.2789(2) | Dy7- O9     | 2.3156(2)  |
| Dy1- O9  | 2.3699(2) | Dy7- O10    | 2.2109(2)  | Dy1- O4  | 2.4154(2) | Dy7- O15    | 2.2007(2)  |
| Dy1- O11 | 2.3927(2) | Dy7- O14    | 2.2958(2)  | Dy1- O13 | 2.2299(2) | Dy7- O17    | 2.3221(2)  |
| Dy1- O12 | 2.3620(2) | Dy7- O16    | 2.3520(2)  | Dy1- O16 | 2.2795(2) | Dy1···Dy2   | 4.0733(3)  |
| Dy1- O30 | 2.2815(2) | Dy7- O17    | 2.3677(2)  | Dy1- O17 | 2.4092(2) | Dy2···Dy3   | 4.0263(3)  |
| Dy1- N8  | 2.4393(2) | Dy7- O20    | 2.3502(3)  | Dy1- O19 | 2.3588(2) | Dy3···Dy4   | 4.0496(3)  |
| Dy2- O6  | 2.3712(2) | Dy7- O21    | 2.3711(2)  | Dy2- O5  | 2.2525(2) | Dy4···Dy5   | 4.0634(3)  |
| Dy2- O8  | 2.2154(2) | Dy1···Dy2   | 4.0363(3)  | Dy2- O26 | 2.3627(3) | Dy5···Dy6   | 3.7897(4)  |
| Dy2- O11 | 2.3706(2) | Dy2···Dy3   | 4.2607(3)  | Dy2- O2w | 2.4206(3) | Dy6···Dy7   | 3.7204(3)  |
| Dy2- O25 | 2.3512(2) | Dy3···Dy4   | 3.8123(3)  | Dy3- O2  | 2.2781(2) | Dy7···Dy1   | 3.8578(3)  |
| Dy2- O26 | 2.4143(2) | Dy4···Dy5   | 3.8045(4)  | Dy3- O10 | 2.2812(2) | Dy1···Dy7a  | 6.5639(6)  |
| Dy2- O31 | 2.4244(2) | Dy5···Dy6   | 3.5894(3)  | Dy3- O20 | 2.3337(3) | Dy7···Dy7a  | 6.5671(5)  |
| Dy3- O9  | 2.3761(2) | Dy6···Dy7   | 3.8773(3)  | Dy3- O21 | 2.3966(2) | Dy6···Dy1a  | 6.7732(5)  |
| Dy3- O12 | 2.3220(2) | Dy7···Dy1   | 3.8675(3)  | Dy3- O27 | 2.3693(2) | Dy1···Dy1a  | 8.1067(8)  |
| Dy3- O13 | 2.3964(2) | Dy1–O4–Dy2  | 113.700(5) | Dy3- O30 | 2.3282(2) | Dy1–O1–Dy2  | 115.615(5) |
| Dy3- O15 | 2.2458(2) | Dy1–O34–Dy2 | 112.013(5) | Dy4- O7  | 2.2553(3) | Dy1–O19–Dy2 | 112.091(5) |
| Dy3- O28 | 2.4405(2) | Dy2–O1–Dy3  | 113.745(5) | Dy4- O11 | 2.4571(2) | Dy2–O2–Dy3  | 112.688(6) |
| Dy3- O29 | 2.3160(2) | Dy2–O2–Dy3  | 118.239(5) | Dy4- O31 | 2.2590(2) | Dy2–O20–Dy3 | 110.349(6) |
| Dy4- O4  | 2.4705(3) | Dy3–O16–Dy4 | 108.657(5) | Dy4- O1w | 2.2753(2) | Dy3–O10–Dy4 | 115.478(5) |
| Dy4- O18 | 2.3897(2) | Dy3–O17–Dy4 | 108.097(5) | Dy5- O8  | 2.3743(2) | Dy3–O21–Dy4 | 108.141(5) |
| Dy4- O22 | 2.2215(2) | Dy4–O14–Dy5 | 99.918(5)  | Dy5- O11 | 2.2816(2) | Dy4–O11–Dy5 | 108.033(4) |
| Dy4- O23 | 2.2461(2) | Dy4–O15–Dy5 | 104.228(5) | Dy5- O23 | 2.2845(2) | Dy4–O22–Dy5 | 108.882(4) |
| Dy4- O34 | 2.4683(2) | Dy5–O12–Dy6 | 100.043(5) | Dy5- O22 | 2.4038(2) | Dy5–O8–Dy6  | 108.076(7) |
| Dy5- O4  | 2.3499(2) | Dy5–O13–Dy6 | 99.470(5)  | Dy5- O24 | 2.1384(2) | Dy5–O23–Dy6 | 110.077(7) |
| Dy5- O5  | 2.2242(2) | Dy6–O7–Dy7  | 104.511(5) | Dy5- O29 | 2.2299(3) | Dy6–O6–Dy7  | 103.679(6) |
| Dy5- O6  | 2.3340(2) | Dy6–O11–Dy7 | 108.975(5) | Dy5- N16 | 2.4496(2) | Dy6–O9–Dy7  | 97.658(5)  |
| Dy5- O24 | 2.3047(2) | Dy7–O6–Dy1  | 110.561(5) | Dy6- O6  | 2.3622(2) | Dy7–O4–Dy1  | 107.409(5) |
| Dy5- O31 | 2.3511(2) | Dy7–O31–Dy1 | 108.151(5) | Dy6- O8  | 2.3075(3) | Dy7–O17–Dy1 | 109.237(6) |
| Dy5- O34 | 2.3998(2) | Dy1–Dy2–Dy3 | 111.752(3) | Dy6- O12 | 2.3642(2) | Dy1–Dy2–Dy3 | 117.387(4) |
| Dy5- N1  | 2.4666(3) | Dy2–Dy3–Dy4 | 88.883(3)  | Dy6- O14 | 2.2360(3) | Dy2–Dy3–Dy4 | 126.882(4) |
| Dy6- O1  | 2.3920(2) | Dy3–Dy4–Dy5 | 126.286(3) | Dy6- O23 | 2.3396(3) | Dy3–Dy4–Dy5 | 115.718(3) |
| Dy6- O2  | 2.3760(2) | Dy4–Dy5–Dy6 | 113.765(3) | Dy6- O28 | 2.3891(2) | Dy4–Dy5–Dy6 | 86.811(3)  |
| Dy6- O3  | 2.1709(2) | Dy5–Dy6–Dy7 | 117.196(3) | Dy7- O3  | 2.2408(2) | Dy5–Dy6–Dy7 | 127.448(4) |
| Dy6- O16 | 2.3408(2) | Dy6–Dy7–Dy1 | 121.730(3) | Dy7- O4  | 2.3710(2) | Dy6–Dy7–Dy1 | 133.896(4) |
| Dy6- O17 | 2.3417(2) | Dy7–Dy1–Dy2 | 94.928(3)  | Dy7- O6  | 2.3694(2) | Dy7–Dy1–Dy2 | 82.239(3)  |

Symmetry codes: (a) 1-x, y, 0.5-z.

**Table S3.** Relaxation fitting parameters from least-squares fitting of  $\chi(\omega)$  data for compound **1**.

| <b>T</b> | $\chi_{s, \text{tot}}$ | <b>FR</b>      |            |                          | <b>SR</b>      |            |                          |
|----------|------------------------|----------------|------------|--------------------------|----------------|------------|--------------------------|
|          |                        | $\Delta\chi_1$ | $\alpha_1$ | $\ln(\tau_1 / \text{s})$ | $\Delta\chi_2$ | $\alpha_2$ | $\ln(\tau_2 / \text{s})$ |
| 1.8      | 0.0213                 | 2.137          | 0.312      | -1.613                   | 44.22          | 0.623      | -7.897                   |
| 2.6      | 0.0364                 | 1.836          | 0.341      | -1.639                   | 39.62          | 0.611      | -7.908                   |
| 3.2      | 0.0452                 | 1.794          | 0.329      | -1.673                   | 34.10          | 0.593      | -7.914                   |
| 3.8      | 0.0526                 | 1.744          | 0.321      | -1.698                   | 30.14          | 0.580      | -7.928                   |
| 4.4      | 0.9427                 | 1.675          | 0.315      | -1.720                   | 26.94          | 0.568      | -7.939                   |
| 5.0      | 1.4459                 | 1.666          | 0.288      | -1.743                   | 24.02          | 0.552      | -7.943                   |
| 5.6      | 1.8360                 | 1.665          | 0.258      | -1.774                   | 21.58          | 0.535      | -7.951                   |
| 6.2      | 2.3591                 | 1.848          | 0.177      | -1.775                   | 18.08          | 0.499      | -7.962                   |
| 6.8      | 2.6610                 | 1.940          | 0.131      | -1.820                   | 16.32          | 0.474      | -7.970                   |
| 7.4      | 2.8398                 | 2.131          | 0.056      | -1.856                   | 14.86          | 0.448      | -7.983                   |
| 8.0      | 2.9404                 | 2.207          | 0.049      | -1.941                   | 13.66          | 0.426      | -7.994                   |
| 8.6      | 2.9780                 | 2.289          | 0.034      | -2.072                   | 12.64          | 0.405      | -8.043                   |
| 9.2      | 2.5424                 | 2.322          | 0.078      | -2.264                   | 11.71          | 0.385      | -8.166                   |
| 9.8      | 2.9506                 | 2.251          | 0.098      | -2.521                   | 11.01          | 0.372      | -8.319                   |
| 10.4     | 2.8091                 | 2.110          | 0.095      | -2.798                   | 10.50          | 0.367      | -8.492                   |
| 11.0     | 2.6412                 | 1.977          | 0.094      | -3.073                   | 10.10          | 0.368      | -8.678                   |
| 11.6     | 2.1966                 | 1.752          | 0.069      | -3.616                   | 10.05          | 0.386      | -9.190                   |
| 12.2     | 1.8114                 | 1.596          | 0.056      | -4.135                   | 9.83           | 0.401      | -9.742                   |
| 12.8     | 1.4268                 | 1.402          | 0.027      | -4.641                   | 9.25           | 0.421      | -10.333                  |
| 13.4     | 1.3020                 | 1.284          | 0.021      | -5.127                   | 8.27           | 0.431      | -10.941                  |
| 14.0     | 1.5077                 | 1.193          | 0.010      | -5.591                   | 7.82           | 0.428      | -11.533                  |
| 14.6     | 2.8852                 | 1.157          | 0.013      | -6.040                   | 6.96           | 0.409      | -12.138                  |
| 15.2     | 2.1990                 | 1.097          | 0.014      | -6.450                   | 6.17           | 0.404      | -12.759                  |
| 15.8     | 2.6799                 | 1.119          | 0.032      | -6.803                   | 5.86           | 0.377      | -13.335                  |
| 16.4     | 3.0993                 | 1.110          | 0.037      | -7.134                   | 5.47           | 0.347      | -13.953                  |
| 17.0     | 3.1487                 | 1.125          | 0.057      | -7.486                   | 4.85           | 0.332      | -14.543                  |
| 17.6     | 3.4236                 | 1.179          | 0.066      | -7.721                   | 4.51           | 0.313      | -15.132                  |
| 18.2     | 3.5129                 | 1.195          | 0.085      | -7.968                   | 5.63           | 0.271      | -15.731                  |
| 18.8     | 3.5237                 | 1.197          | 0.096      | -8.214                   | 6.64           | 0.264      | -16.321                  |
| 19.4     | 3.5620                 | 1.265          | 0.100      | -8.467                   | 6.71           | 0.227      | -16.939                  |
| 20.0     | 3.6917                 | 1.301          | 0.114      | -8.715                   | 7.96           | 0.110      | -17.214                  |

**Table S3.** Relaxation fitting parameters from least-squares fitting of  $\chi(\omega)$  data for compound **2**.

| <b>T</b> | $\chi_r$ | $\chi_s$ | $\alpha$ | $\ln(\tau/s)$ |
|----------|----------|----------|----------|---------------|
| 1.8      | 35.10    | 1.607    | 0.205    | -8.311        |
| 2.0      | 32.10    | 1.000    | 0.188    | -8.395        |
| 2.3      | 28.97    | 0.266    | 0.168    | -8.470        |
| 2.6      | 26.00    | 0.274    | 0.155    | -8.519        |
| 2.9      | 23.96    | 0.055    | 0.146    | -8.537        |
| 3.2      | 21.54    | 0.523    | 0.140    | -8.543        |
| 3.5      | 20.10    | 0.325    | 0.136    | -8.547        |
| 3.8      | 18.49    | 0.480    | 0.131    | -8.548        |
| 4.1      | 16.74    | 0.986    | 0.129    | -8.549        |
| 4.4      | 15.09    | 1.440    | 0.124    | -8.551        |
| 4.7      | 13.47    | 2.070    | 0.123    | -8.559        |
| 5.0      | 11.85    | 2.646    | 0.117    | -8.563        |
| 5.3      | 10.23    | 3.452    | 0.115    | -8.569        |
| 5.6      | 8.50     | 4.387    | 0.113    | -8.581        |
| 5.9      | 6.67     | 5.505    | 0.109    | -8.598        |
| 6.2      | 4.83     | 6.631    | 0.106    | -8.613        |
| 6.5      | 2.98     | 7.787    | 0.100    | -8.623        |
| 6.8      | 1.21     | 8.914    | 0.095    | -8.637        |
| 7.1      | 0.08     | 9.616    | 0.089    | -8.652        |
| 7.4      | 1.39     | 10.481   | 0.087    | -8.671        |
| 7.7      | 3.18     | 11.714   | 0.082    | -8.909        |
| 8.0      | 5.51     | 13.479   | 0.074    | -9.119        |

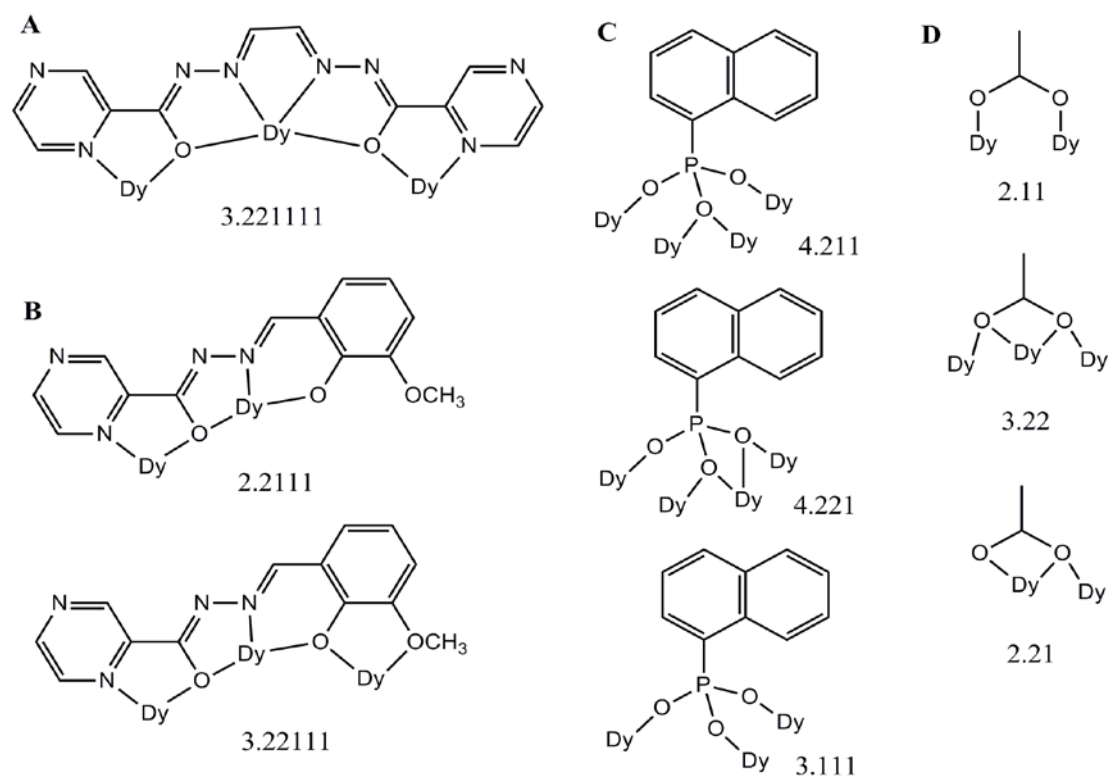

**Scheme S1.** The coordination modes of EDDC<sup>2-</sup> (A), opch<sup>2-</sup> (B), 1-naphthylphosphonate (C) and acetate (D) ligands.



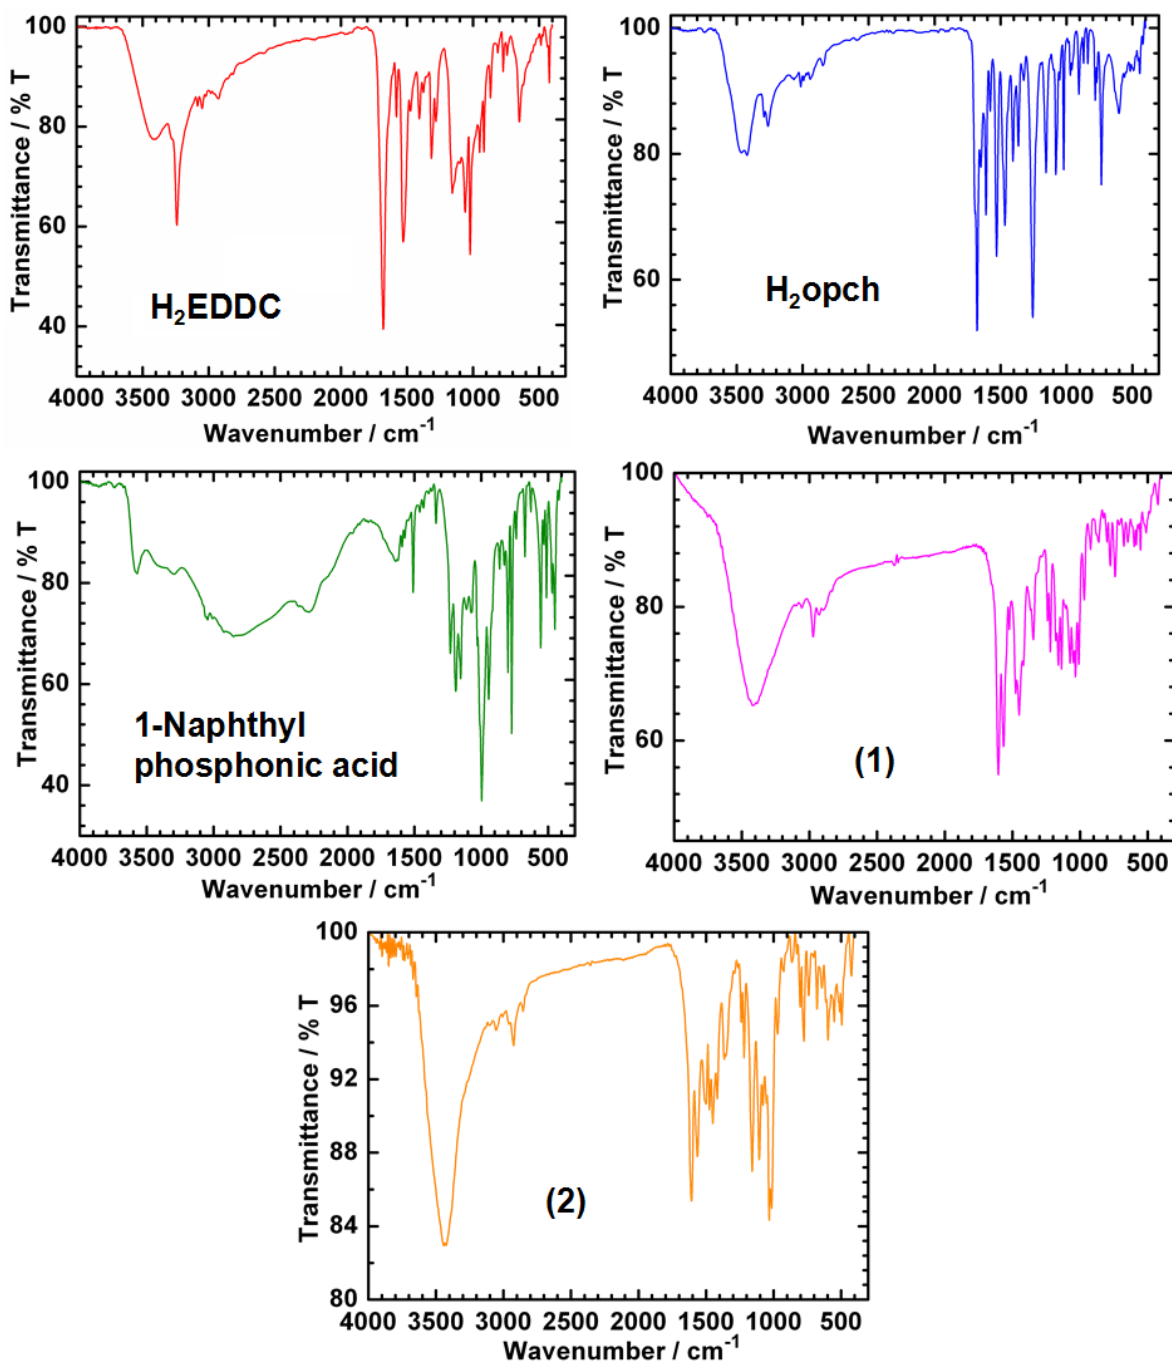

**Figure S1.** Infrared spectra of  $\text{H}_2\text{EDDC}$ ,  $\text{H}_2\text{opch}$ , 1-naphthyl phosphonic acid, compounds 1 and 2.

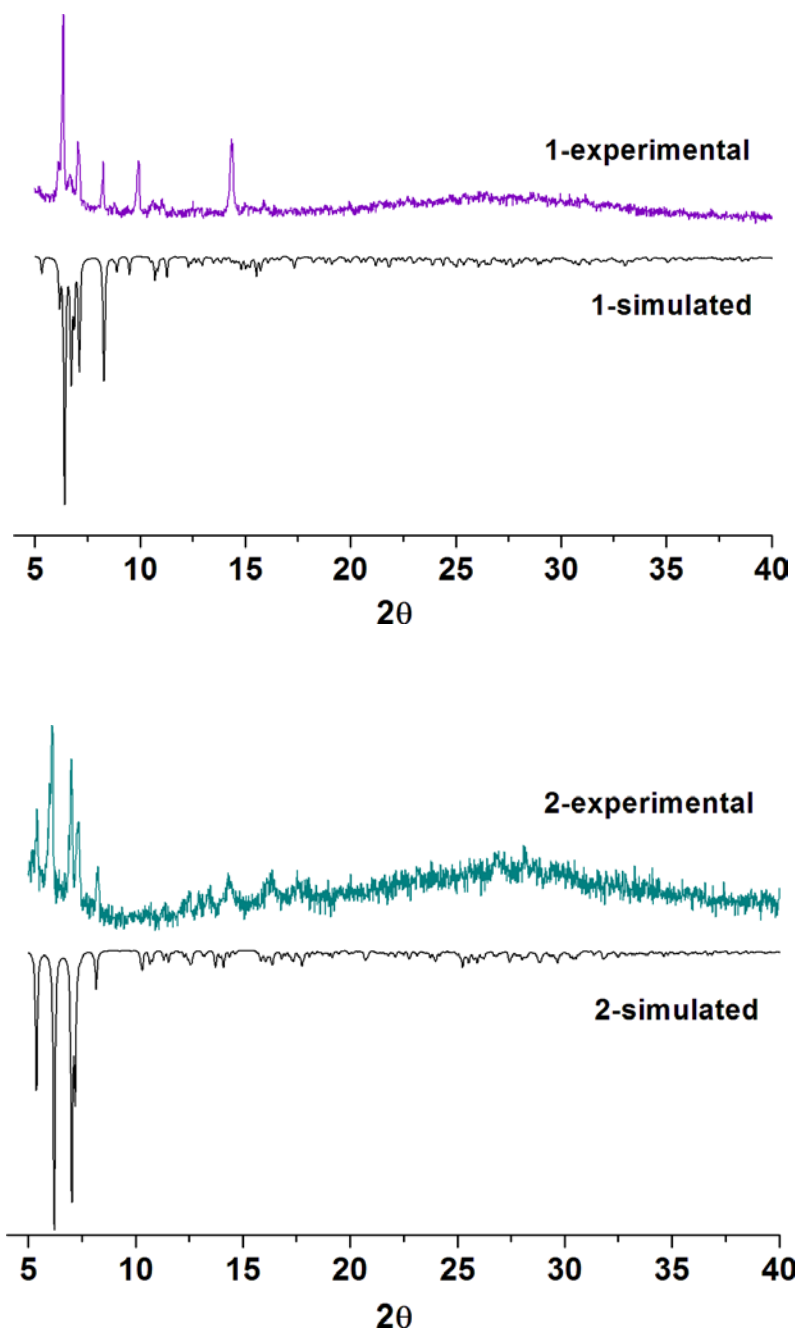

**Figure S2.** PXRD patterns of compounds **1** and **2**.

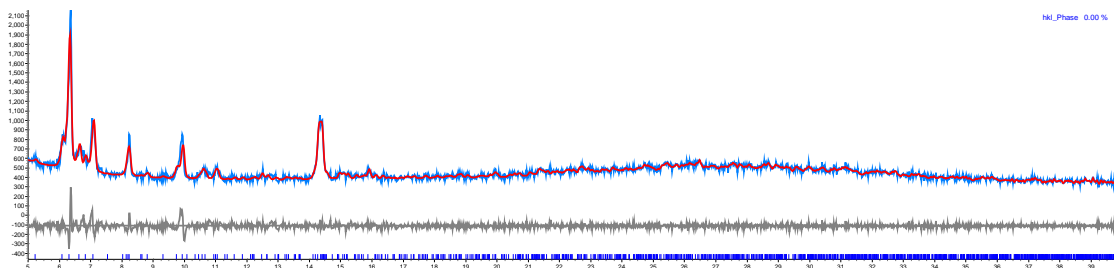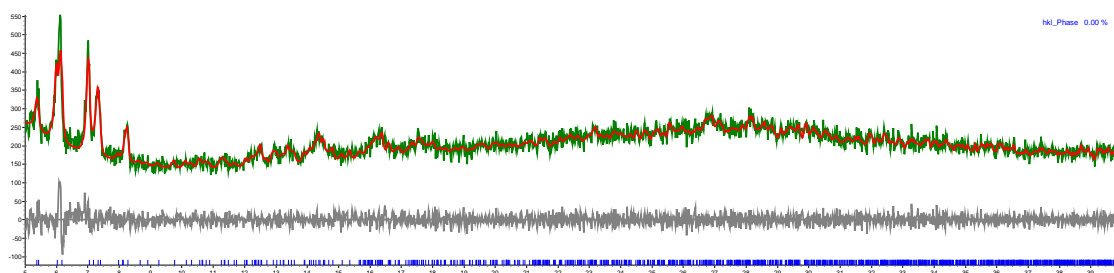

**Figure S3.** Pawley fit of the fresh sample of compounds **1** (top) and **2** (bottom) performed using Topas 4.2 program.

Cell parameters for **1**:  $P2_1/c$ ,  $a = 14.89 \text{ \AA}$ ,  $b = 33.79 \text{ \AA}$ ,  $c = 25.62 \text{ \AA}$ ,  $\beta = 103.1^\circ$ ,  $V = 12560.6 \text{ \AA}^3$  ( $R_{wp} = 5.37$ ).

Cell parameters for **2**:  $C2/c$ ,  $a = 22.23 \text{ \AA}$ ,  $b = 25.04 \text{ \AA}$ ,  $c = 45.22 \text{ \AA}$ ,  $\beta = 102.0^\circ$ ,  $V = 24626.5 \text{ \AA}^3$  ( $R_{wp} = 6.85$ ).

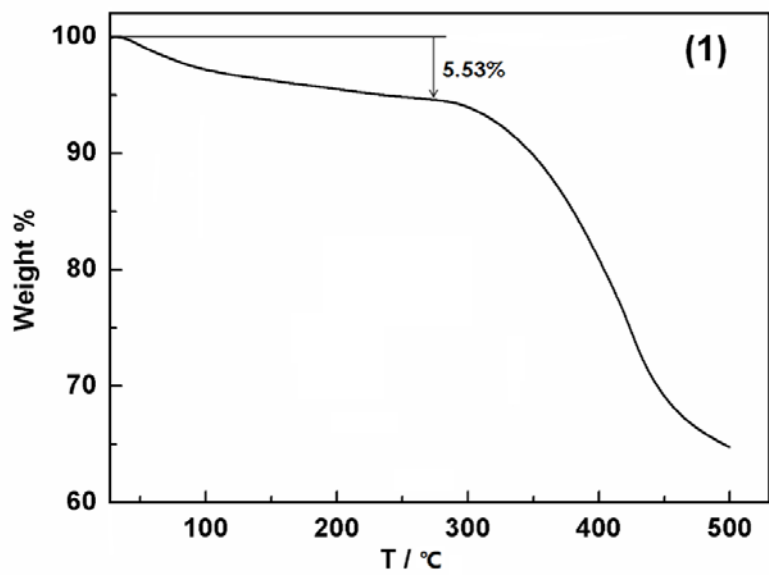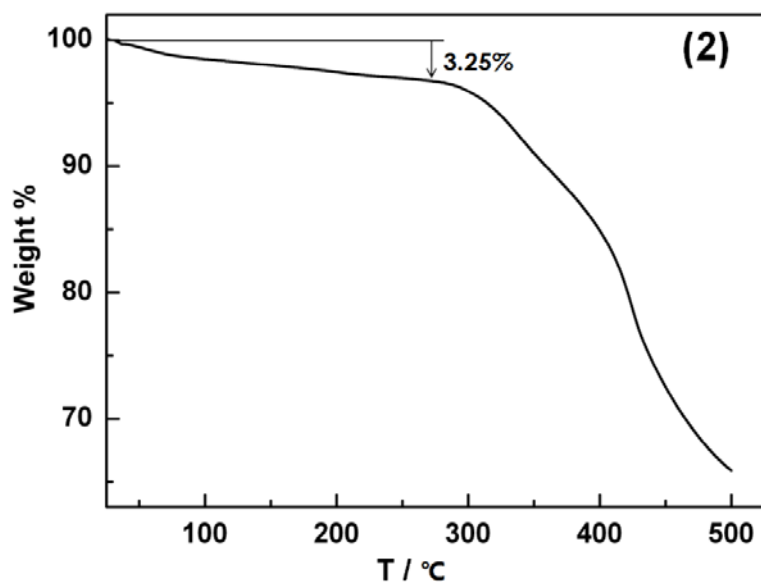

**Figure S4.** TG curves of compounds **1** (top) and **2** (bottom).



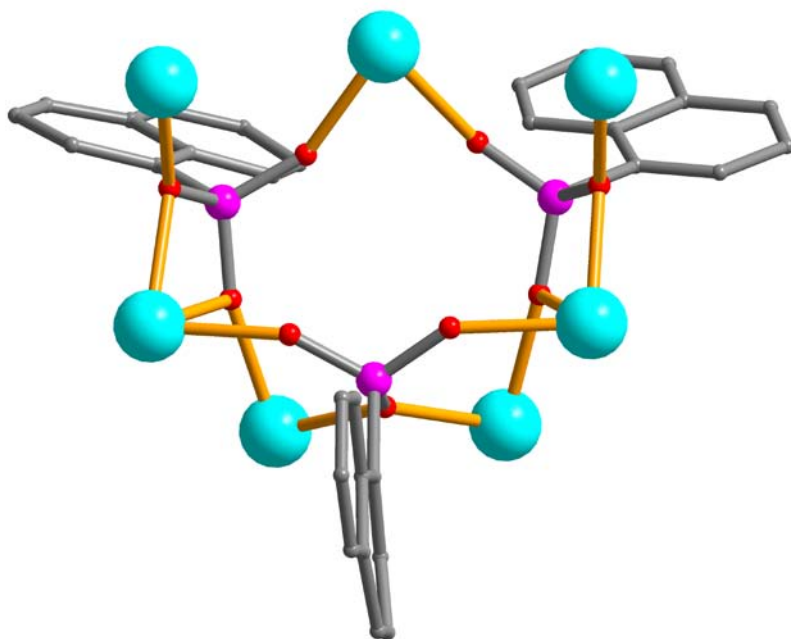

**Figure S6.** The  $[\text{Dy}_7(\text{C}_{10}\text{H}_7\text{PO}_3)_3]^{15+}$  core for compound **1**. Turquoise Dy, Red O, Blue N, purple P, grey C.

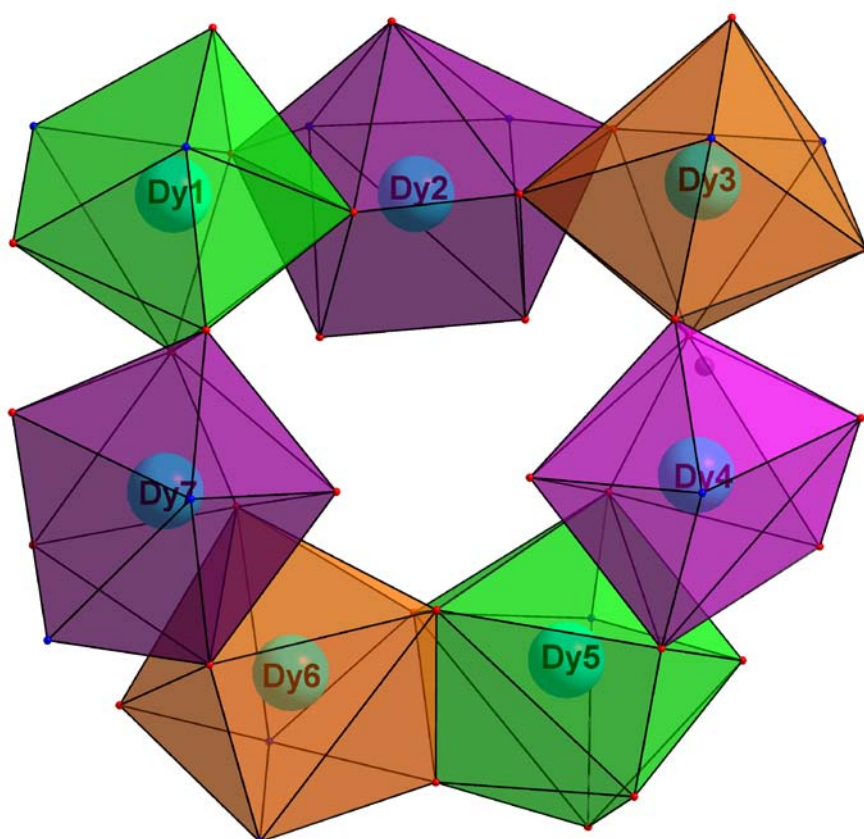

**Figure S7.** Coordination polyhedra observed for the metal centers in **1**.

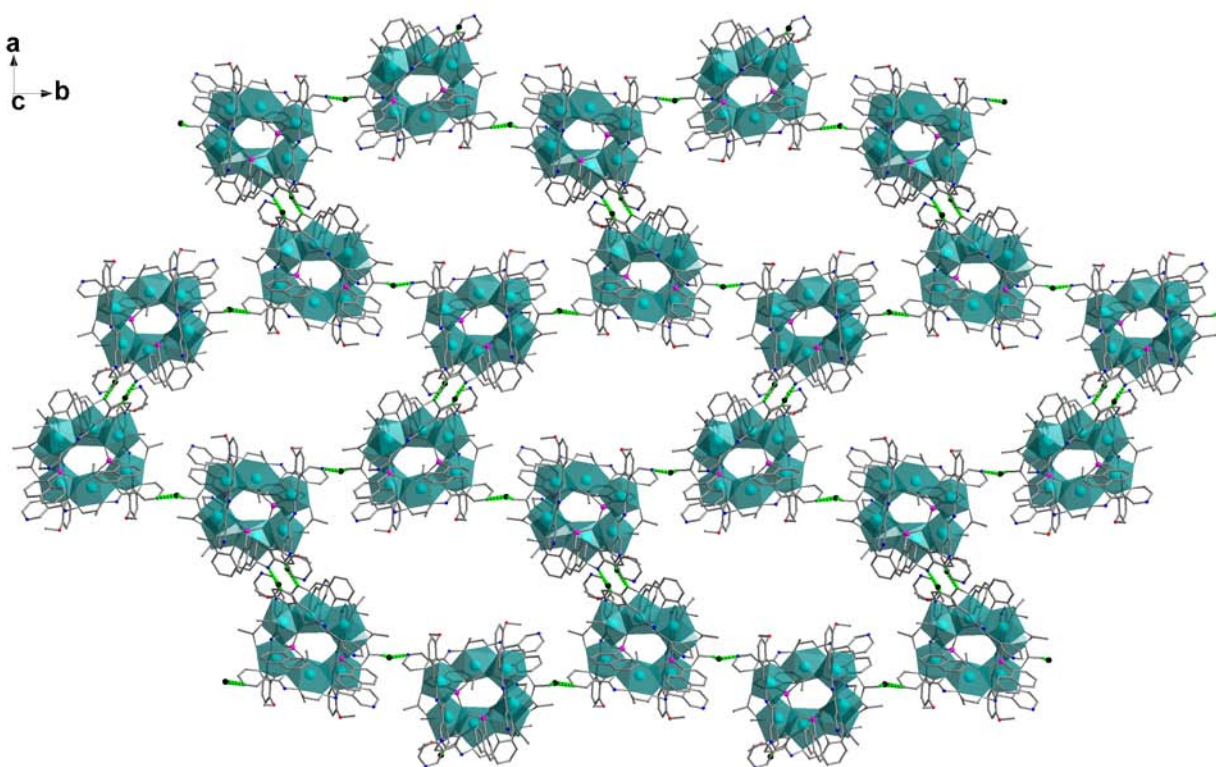

**Figure S8.** Illustration showing the hydrogen-bonding interactions (light green lines) and the circular hexagon packing arrangement of the molecules in compound **1**.  
Turquoise Dy, Red O, Blue N, purple P, grey C.

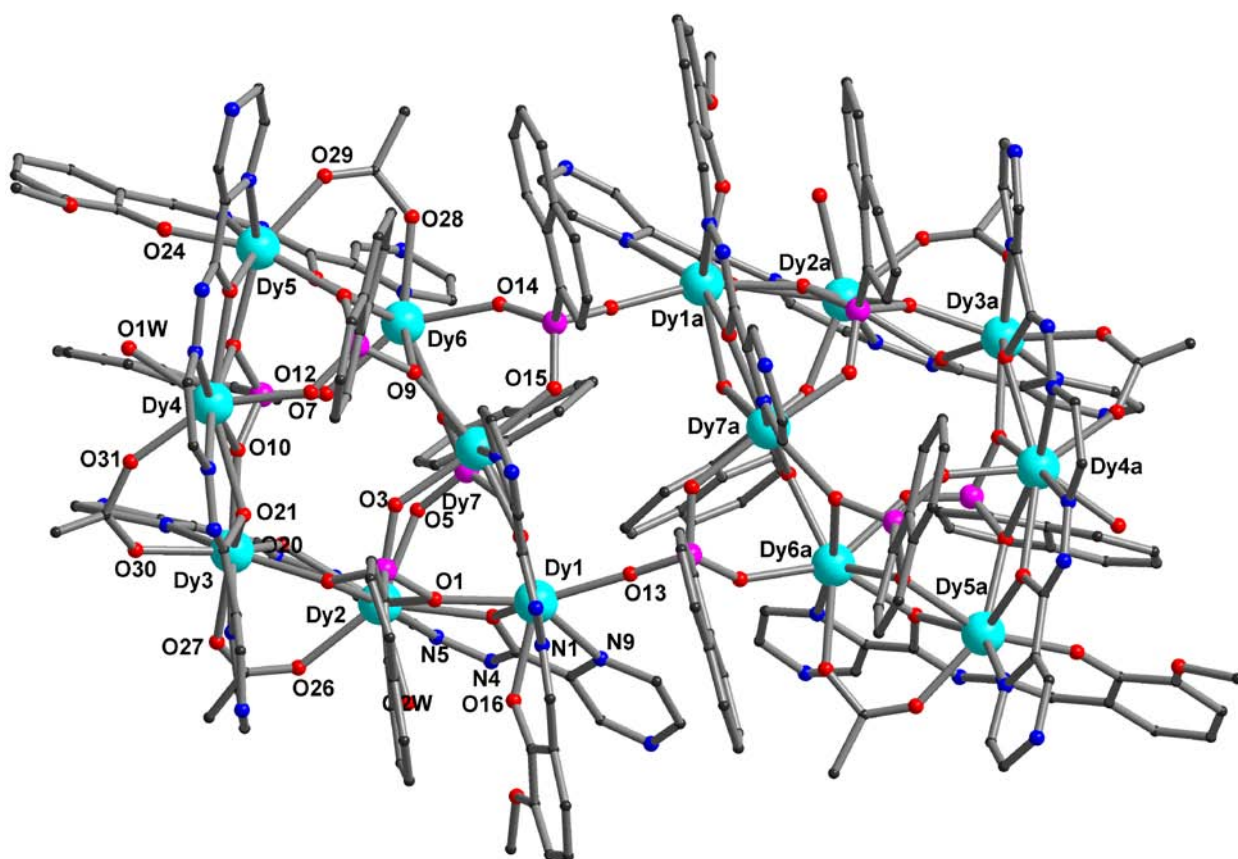

**Figure S9.** Partially labeled structure of compound **2**. Turquoise Dy, Red O, Blue N, purple P, grey C.

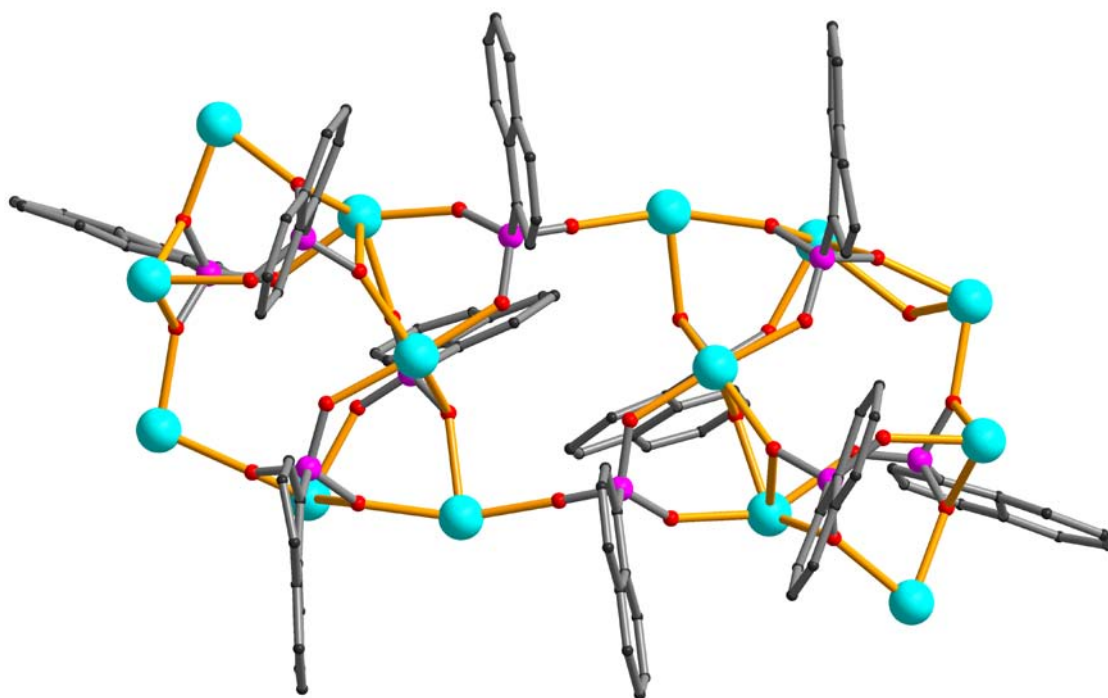

**Figure S10.** The  $[\text{Dy}_{14}(\text{C}_{10}\text{H}_7\text{-PO}_3)_{10}]^{22+}$  core for compound **2**. Turquoise Dy, Red O, Blue N, purple P, grey C.



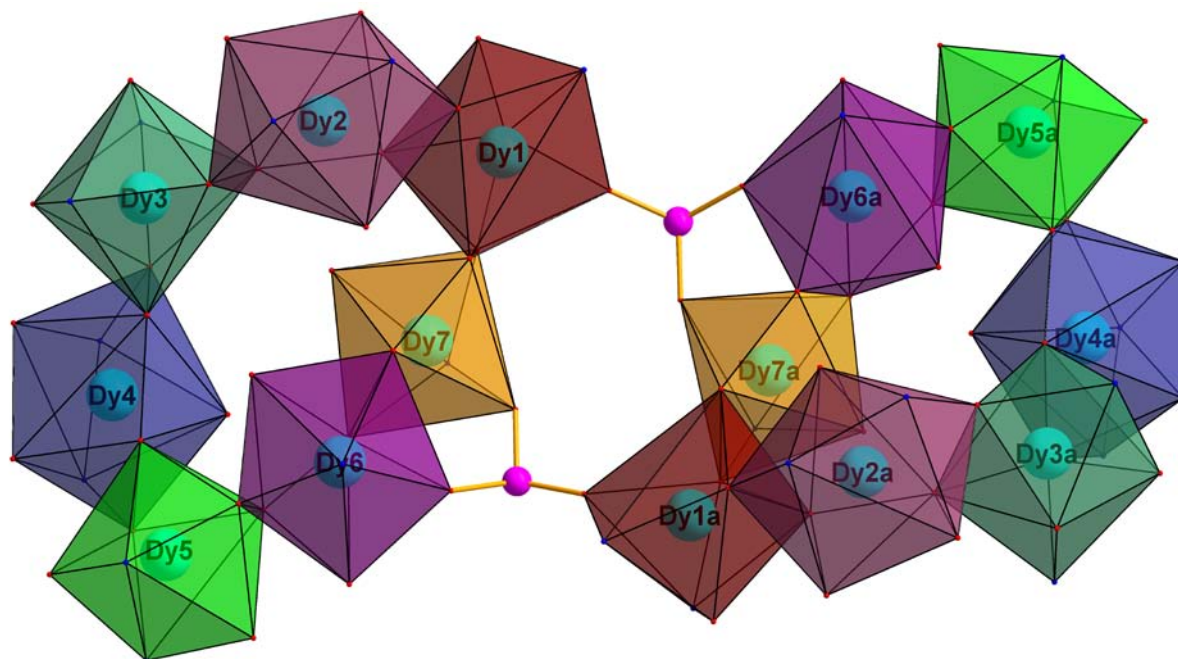

**Figure S11.** Coordination polyhedra observed for the metal center in **2**.

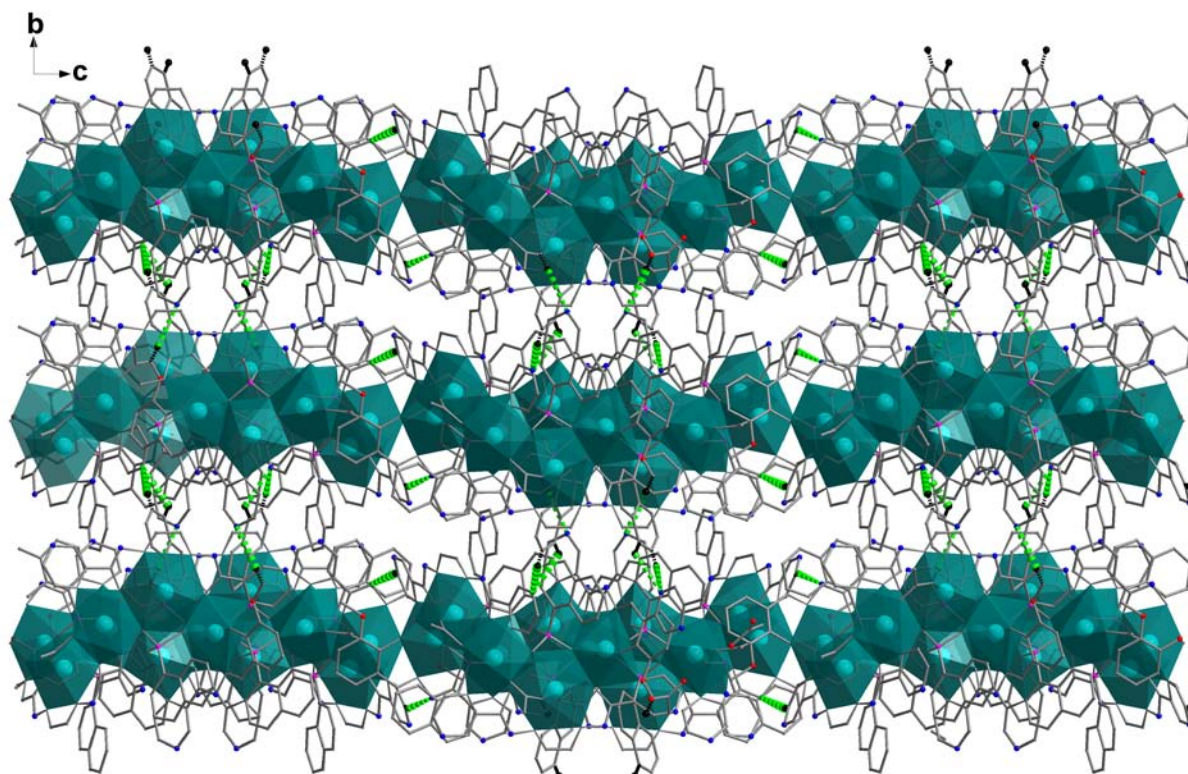

**Figure S12.** 3D hydrogen-bonded supramolecular structure of compound **2**. Turquoise Dy, Red O, Blue N, purple P, grey C.

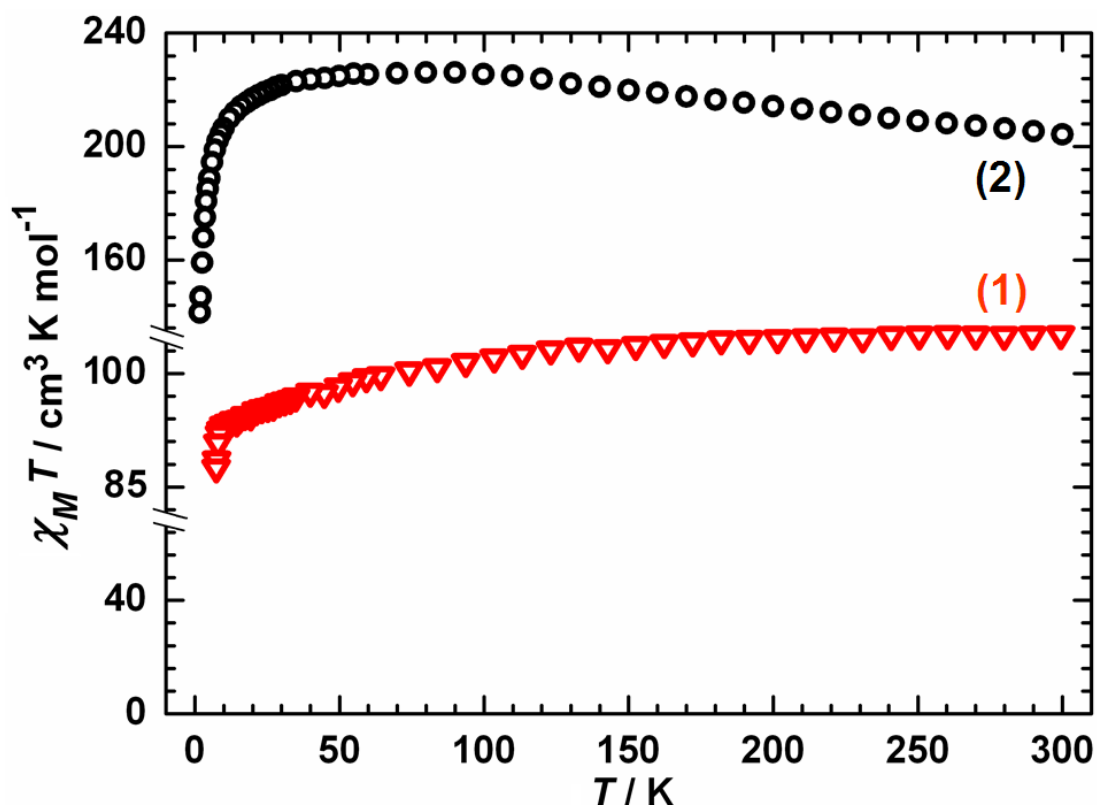

**Figure S13.** Temperature dependence of the  $\chi_M T$  product at 1 kOe for **1** (bottom) and **2** (top).

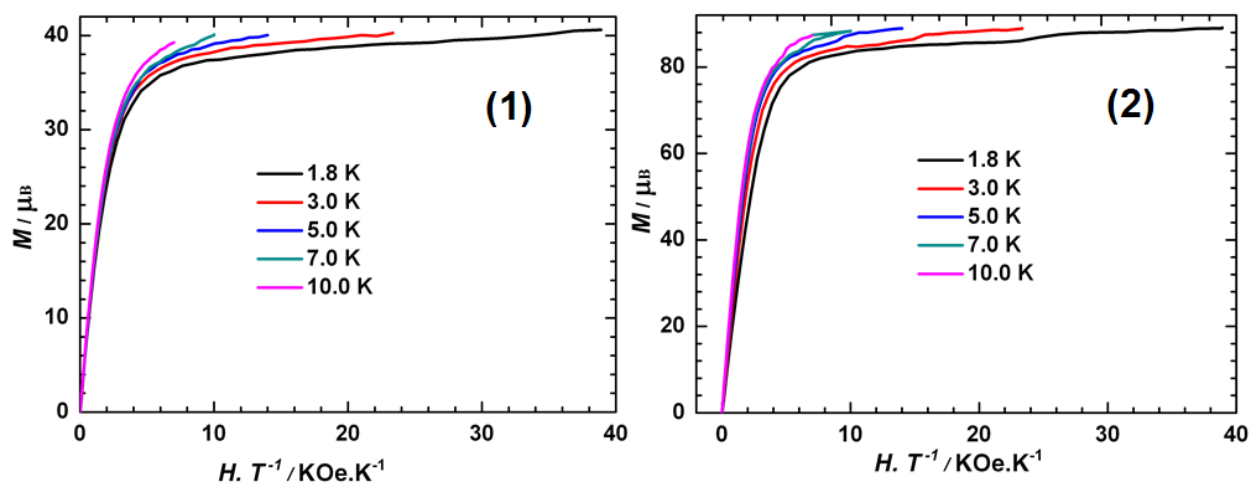

**Figure S14.**  $M$  vs.  $H/T$  plot at different temperatures below 10.0 K for **1** (left) and **2** (right).

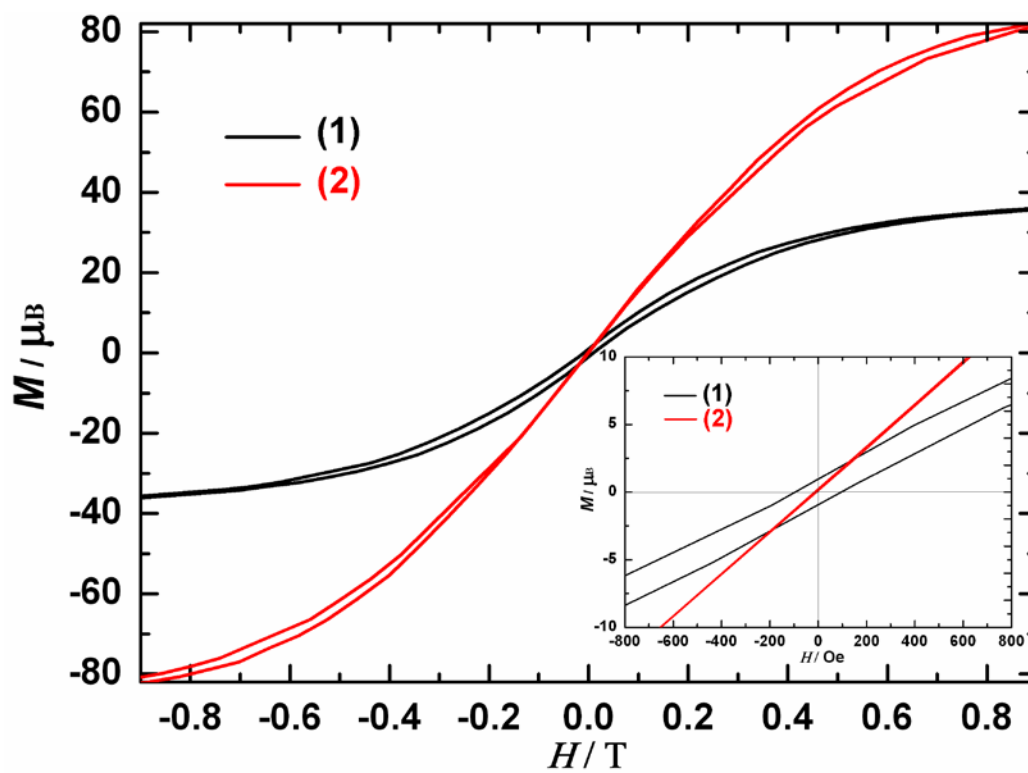

**Figure S15.** The hysteresis loops of compounds **1** (black lines) and **2** (red lines) at 1.8 K. Sweep rate:  $600 \text{ Oe s}^{-1}$ .

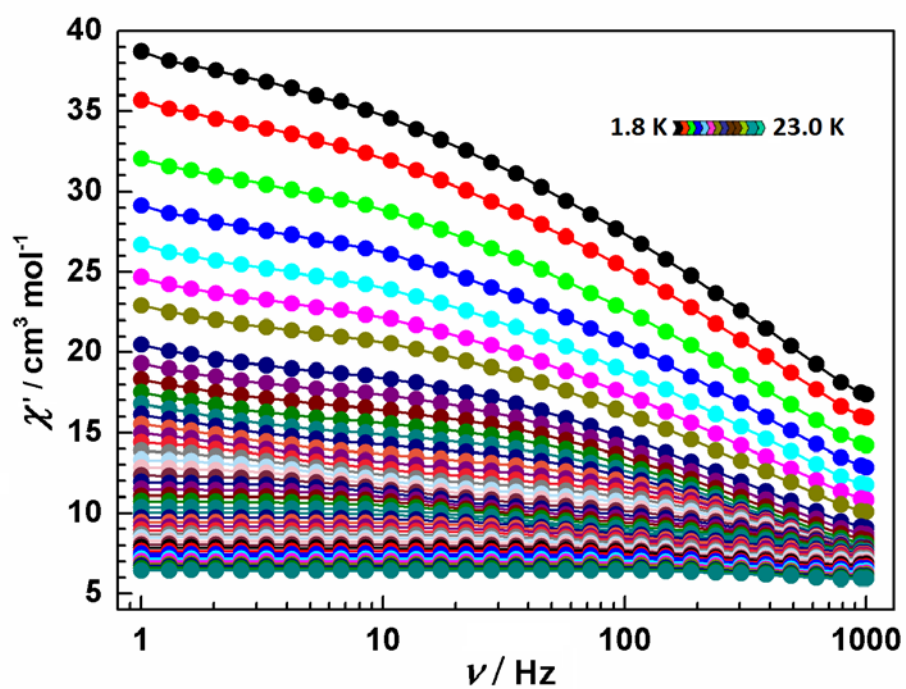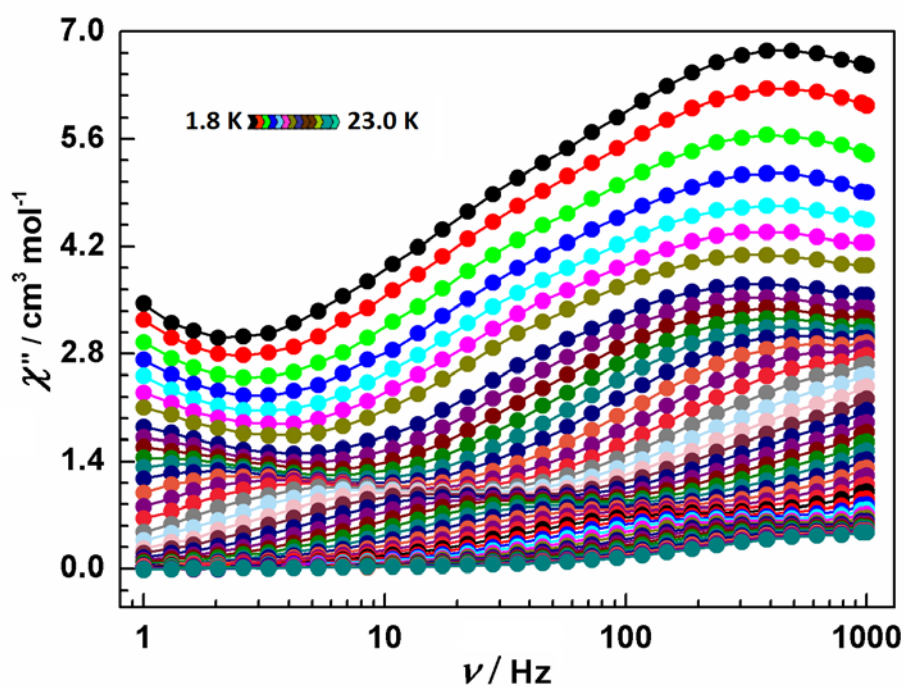

**Figure S16.** Frequency dependence of the  $\chi'$  and  $\chi''$  products, *ac* susceptibility under zero-dc field for compound **1**.

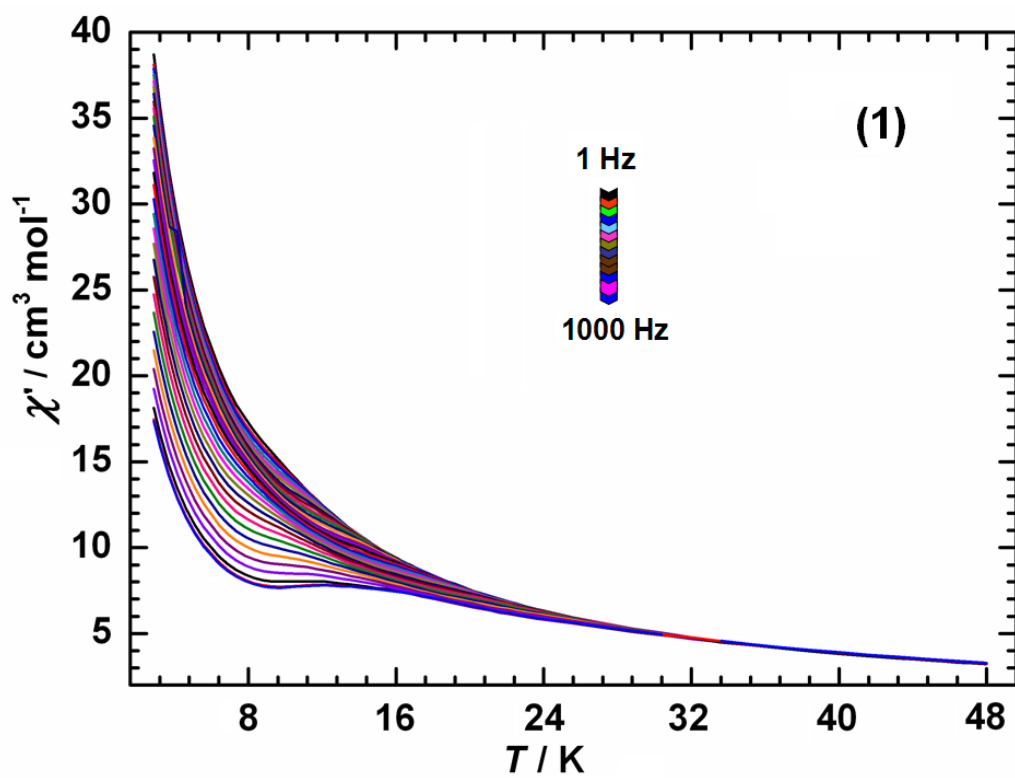

Figure S17. Temperature dependence of the  $\chi'$  product, *ac* susceptibility under zero-dc field for compound 1.

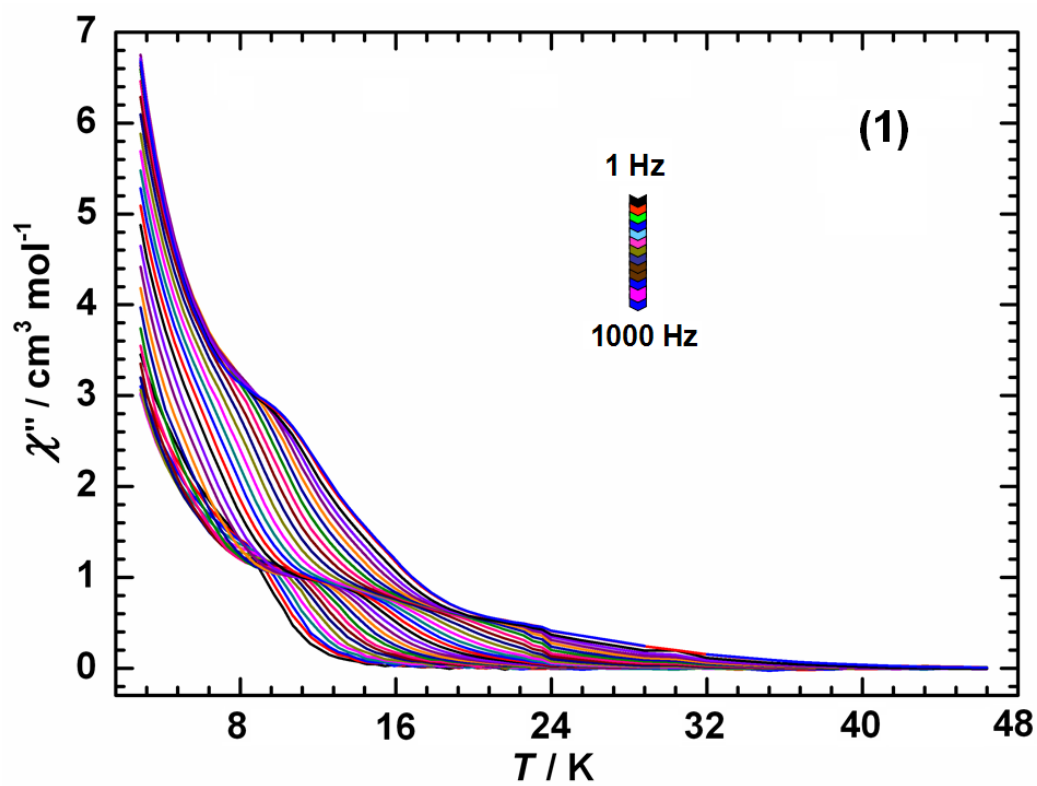

Figure S18. Temperature dependence of the  $\chi''$  product, *ac* susceptibility under zero-dc field for compound 1.

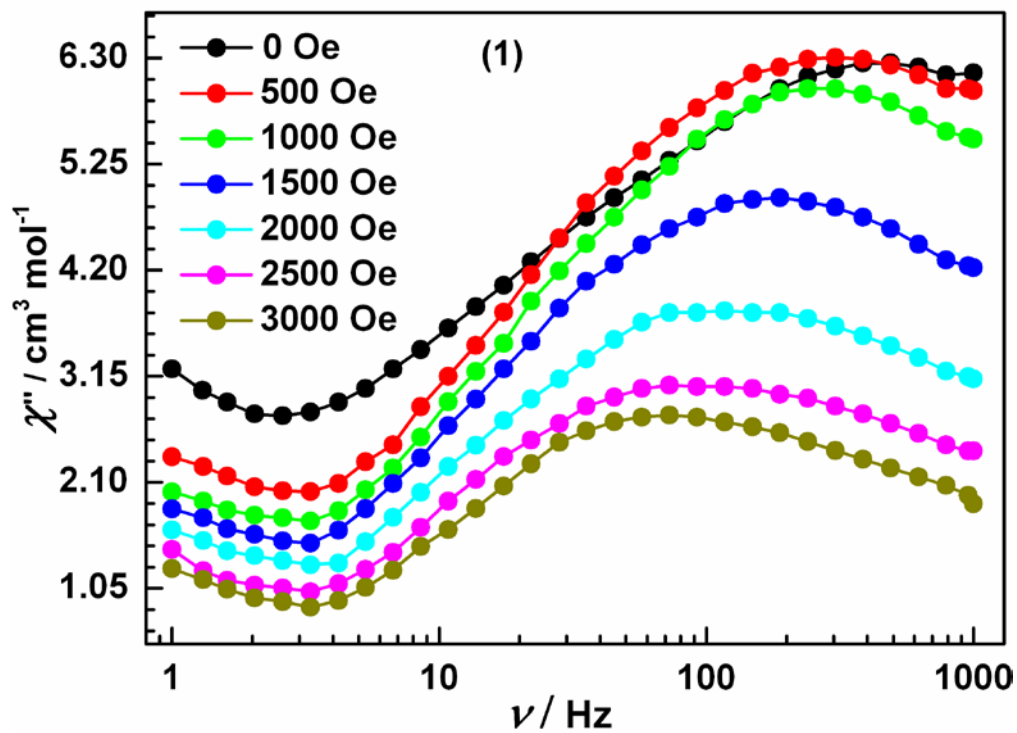

**Figure S19.** The out-of-phase ( $\chi''$ ) ac susceptibility as a function of the dc applied field measured at 2.0 K for compound **1**.

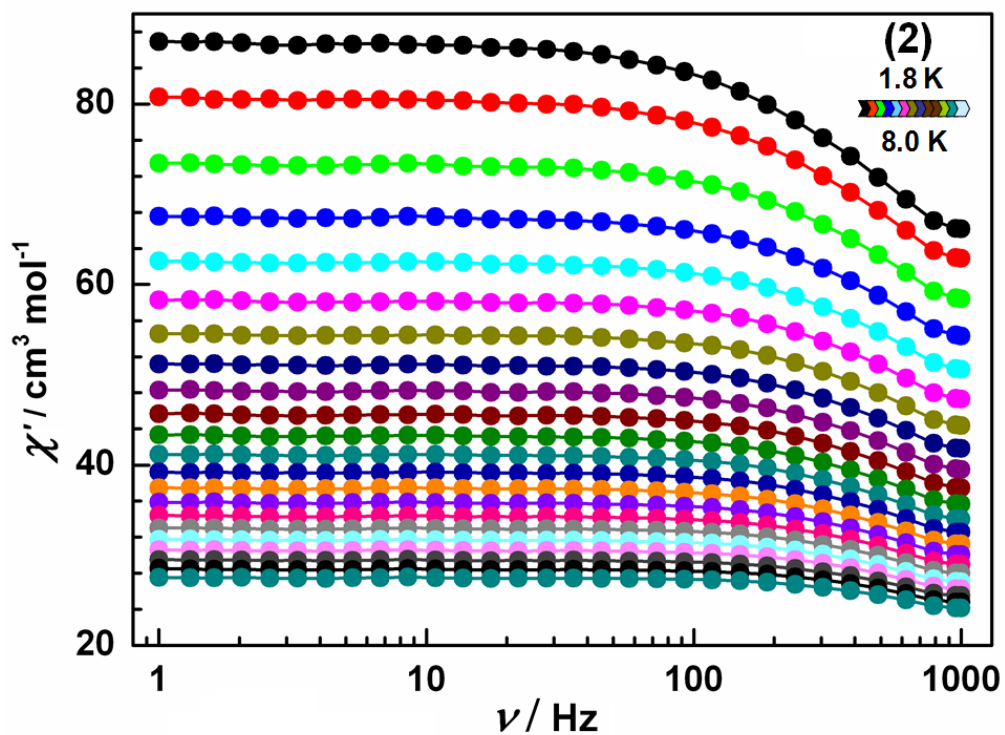

**Figure S20.** Frequency dependence of the  $\chi'$  product, ac susceptibility under zero-dc field for compound **2**.

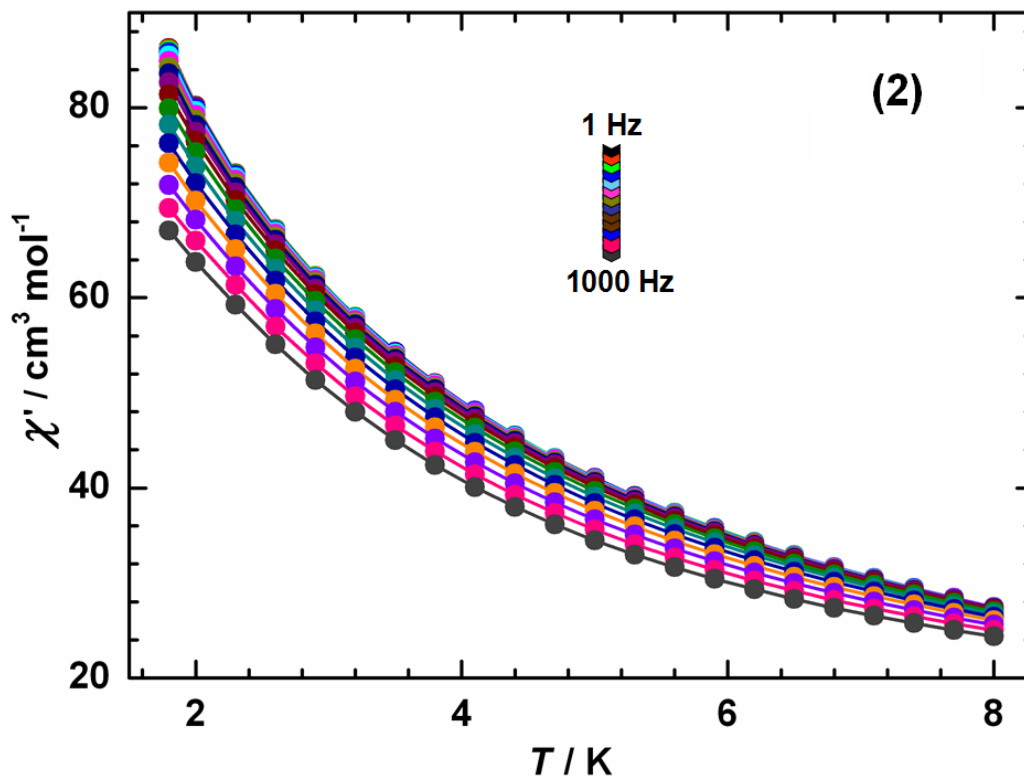

**Figure S21.** Temperature dependence of the  $\chi'$  product, *ac* susceptibility under zero-dc field for compound 2.

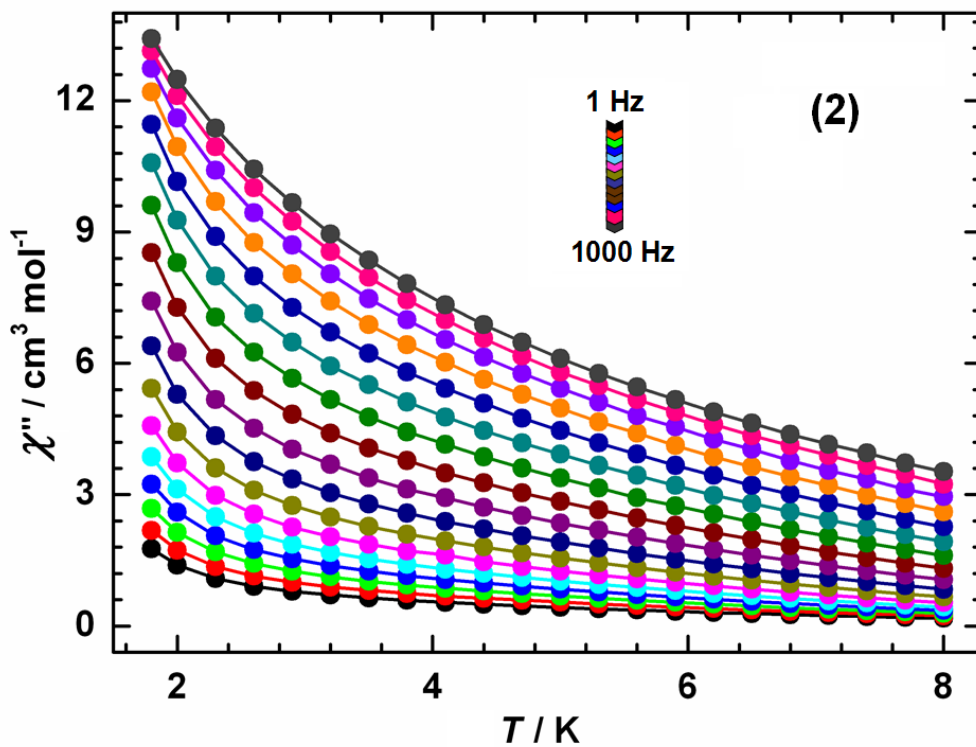

**Figure S22.** Temperature dependence of the  $\chi''$  product, *ac* susceptibility under zero-dc field for compound 2.

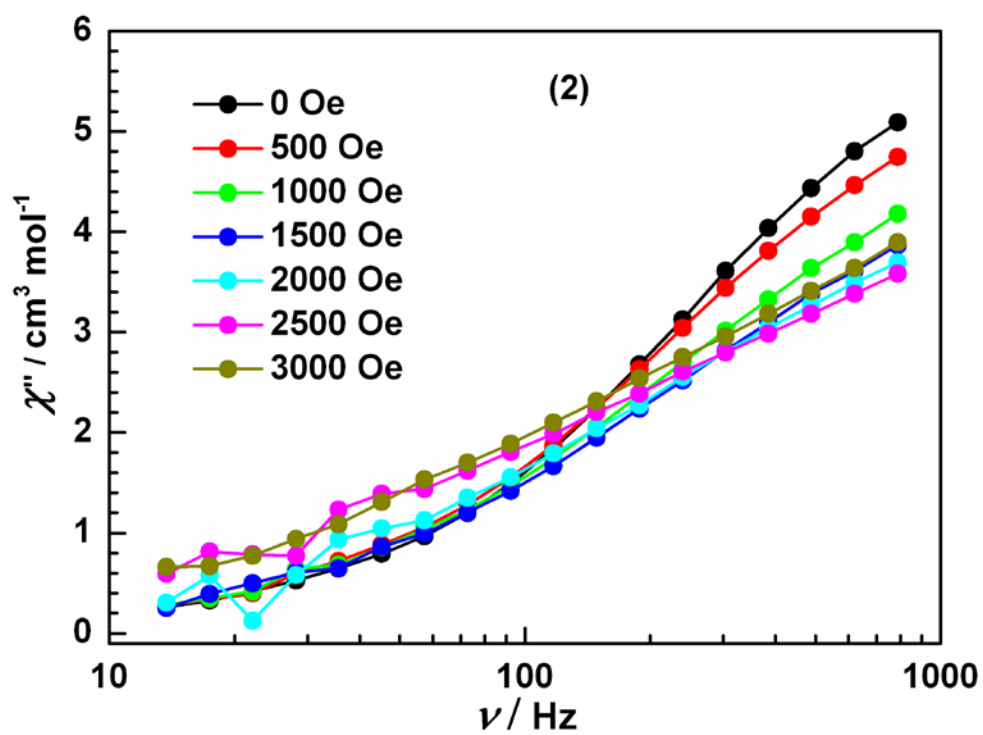

**Figure S23.** The out-of-phase ( $\chi''$ ) ac susceptibility as a function of the dc applied field measured at 2.0 K for compound **2**.
